# Supplementary material for: Exploring of Graduate Education System in Biomedical Science: A mixed method design
Source: Research Square preprint supplement (doi:10.21203/rs.3.rs-7175802/v1), 2025-09-03
Supplement: Supplementary file 1 [file 01871181ad74726cce3ea3e2.docx]

**Appendix 1.** Survey Questionnaire for Needs Assessment

**Section 1. Satisfaction with Current Education**

**Q1.** Overall, how satisfied are you with the current graduate education in the Department of Biomedical Sciences?
① Very satisfied ② Satisfied ③ Neutral ④ Dissatisfied ⑤ Very dissatisfied

**Q2.** One of the educational goals is to foster in-depth scientific understanding of human physiology and diseases. How well does the current graduate education support this goal?
① Very satisfied ② Satisfied ③ Neutral ④ Dissatisfied ⑤ Very dissatisfied

**Q3.** Another educational goal is to develop the ability to identify important scientific questions and independently conduct research based on scientific reasoning in health and disease. How well does the current graduate education support this goal?
① Very satisfied ② Satisfied ③ Neutral ④ Dissatisfied ⑤ Very dissatisfied

**Q4.** To what extent do you believe the current education is helpful for conducting your own biomedical research?
① Very satisfied ② Satisfied ③ Neutral ④ Dissatisfied ⑤ Very dissatisfied

**Q4-1.** To what extent does the current education help improve interdisciplinary integration across related fields?
① Very satisfied ② Satisfied ③ Neutral ④ Dissatisfied ⑤ Very dissatisfied

**Q5.** Do you think that appropriate instructional methods (e.g., lectures, problem-based learning, group activities, simulations) are applied in accordance with the characteristics of each course?
① Very satisfied ② Satisfied ③ Neutral ④ Dissatisfied ⑤ Very dissatisfied

**Q6.** Overall, how satisfied are you with the educational environment (e.g., classroom and lab settings) of the Department of Biomedical Sciences?
① Very satisfied ② Satisfied ③ Neutral ④ Dissatisfied ⑤ Very dissatisfied

**Section 2. Perspectives on Educational Innovation**

**Q7.** What is your opinion on shifting to a competency-based curriculum* for improving the graduate program?
① Strongly agree ② Agree ③ Neutral ④ Disagree ⑤ Strongly disagree
*Competency-based curriculum: A curriculum that is organized around the abilities required to successfully perform specific tasks or roles, rather than traditional subject-based organization.

**Q8.** What is your opinion on introducing online lectures into the Department’s courses?
① Strongly agree ② Agree ③ Neutral ④ Disagree ⑤ Strongly disagree

**Q9.** Do you think various technologies (e.g., virtual reality, augmented reality, tools for creative thinking) should be utilized more effectively in the courses offered by the department?
① Strongly agree ② Agree ③ Neutral ④ Disagree ⑤ Strongly disagree

**Q10.** If you have any suggestions for improving the graduate education of the Department of Biomedical Sciences at Seoul National University, please describe them freely below.
